# Supplementary material
Source: publisher site journal article supplement (https://www.dovepress.com/article/498792)
Supplement: Supplementary file 1 [file get_supplementary_file.php]

**Table S1 Symptom clusters of patients with ECOPD determined by exploratory factor analysis**

| Symptom cluster | symptom | Loading | | |
| --- | --- | --- | --- | --- |
| 1 | 2 | 3 |
| Fatigue-activity symptom cluster | Fatigue | 0.822 |  |  |
| Decreased exercise tolerance | 0.792 |  |  |
| Activity restriction | 0.635 |  |  |
| Shortness of breath | 0.559 |  |  |
| Nutrition-sleep symptom cluster | Loss of appetite |  | 0.811 |  |
| Weight loss |  | 0.742 |  |
| Insomnia |  | 0.750 |  |
| Cough-sputum symptom cluster | Expectoration |  |  | 0.790 |
| Cough |  |  | 0.775 |
| Chest distress |  |  | 0.531 |
| Variation |  | 35.419% | 14.444% | 10.597% |
| Cumulative variation |  | 35.419% | 49.863% | 60.461% |

**Table S2 Single-factor regression analysis results of different subgroups of patients with ECOPD**

| Variables | Overall  N=208 | class1  N=112 | class2  N=96 | OR | 95%CI | *P* |
| --- | --- | --- | --- | --- | --- | --- |
| age, year |  |  |  |  |  | 0.501 |
| <65 | 33 (15.9) | 16 (14.3) | 17 (17.7) | Reference | Reference |  |
| ≥65 | 175 (84.1) | 96(85.7) | 79 (82.3) | 1.290 | 0.61-2.72 |  |
| gender |  |  |  |  |  |  |
| male | 175 (84.1) | 91 (81.3) | 84 (87.5) | Reference | Reference |  |
| female | 33 (15.9) | 21 (18.8) | 12 (12.5) | 1.62 | 0.75-3.48 | 0.222 |
| level of education |  |  |  |  |  | 0.744 |
| illiteracy | 63 (30.3) | 35 (31.3) | 28 (29.2) | Reference | Reference |  |
| primary | 103 (49.5) | 52 (46.6) | 51 (53.1) | 0.82 | 0.43-1.53 | 0.526 |
| junior middle school | 24 (11.5) | 12 (10.7) | 12 (12.5) | 0.80 | 0.31-2.05 | 0.642 |
| high school and above | 18 (8.7) | 13 (11.6) | 5 (5.2) | 2.08 | 0.66-6.54 | 0.210 |
| ECOPD severity grade |  |  |  |  |  |  |
| mild | 98 (47.1) | 49 (43.8) | 49 (51.0) | Reference | Reference |  |
| moderate | 39 (18.8) | 21 (18.8) | 18 (18.8) | 1.17 | 0.55-2.45 | 0.685 |
| severe | 71 (34.1) | 42 (37.5) | 29 (30.2) | 1.45 | 0.78-2.68 | 0.239 |
| history of frequent exacerbation |  |  |  |  |  |  |
| no | 150 (72.1) | 75 (67.0） | 75 (78.1) | Reference | Reference |  |
| yes | 58 (27.9) | 37 (33.0) | 21 (21.9) | 1.76 | 0.94-3.29 | 0.075 |
| smoking |  |  |  |  |  |  |
| no | 92 (44.2) | 56 (50.0) | 36 (37.5) | Reference | Reference |  |
| yes | 116 (55.8) | 56 (50.0) | 60 (62.5) | 0.60 | 0.34-1.05 | 0.071 |
| alcohol |  |  |  |  |  |  |
| no | 137 (65.9) | 77 (68.8) | 60 (62.5) | Reference | Reference |  |
| yes | 71 (34.1) | 35 (31.3) | 36 (37.5) | 0.76 | 0.43-1.35 | 0.344 |
| occupational exposure |  |  |  |  |  |  |
| no | 176 (84.6) | 93 (83.0) | 83 (86.5) | Reference | Reference |  |
| yes | 32 (15.4) | 19 (17.0) | 13 (13.5) | 1.30 | 0.61-2.80 | 0.496 |
| infection |  |  |  |  |  |  |
| no | 138 (66.3) | 68 (60.7) | 70 (72.9) | Reference | Reference |  |
| bacteria | 18 (8.7) | 12 (10.7) | 6 (6.3) | 2.06 | 0.73-5.80 | 0.172 |
| fungus | 17 (8.2) | 11 (9.8) | 6(6.2) | 1.89 | 0.66-5.39 | 0.235 |
| virus | 21 (10.1) | 11 (9.8) | 10 (10.4) | 1.13 | 0.45-2.84 | 0.791 |
| mixed/indeterminate infection | 14 (6.7) | 10 (8.9) | 4 (4.2) | 2.57 | 0.77-8.60 | 0.125 |
| ADL |  |  |  |  |  |  |
| ≥60 | 135 (64.9) | 56 (50.0) | 79 (82.3) | Reference | Reference |  |
| ＜60 | 73 (35.1) | 56(50.0) | 17 (17.7) | 4.65 | 2.45-8.83 | <0.001 |
| allergy |  |  |  |  |  |  |
| no | 184 (88.5) | 99 (88.4) | 85 (88.5) | Reference | Reference |  |
| yes | 24 (11.5) | 13 (11.6) | 11 (11.5) | 1.01 | 0.43-2.38 | 0.973 |
| hypertension, year |  |  |  |  |  |  |
| 0 | 108 (51.9) | 58 (51.8) | 50 (52.1) | Reference | Reference |  |
| 0-5 | 33 (15.9) | 17 (15.2) | 16 (16.7) | 0.92 | 0.42-2.00 | 0.826 |
| ＞5 | 67 (32.2) | 37 (33.0) | 30 (31.3) | 1.06 | 0.58-1.96 | 0.844 |
| diabetes, year |  |  |  |  |  |  |
| 0 | 178 (85.6) | 99 (88.4) | 79 (82.3) | Reference | Reference |  |
| 0-5 | 12 (5.8) | 4 (3.6) | 8 (8.3) | 0.40 | 0.12-1.37 | 0.145 |
| ＞5 | 18 (8.7) | 9 (8.0) | 9 (9.4) | 0.80 | 0.30-2.11 | 0.648 |
| COPD, year |  |  |  |  |  |  |
| 0 | 22 (10.6) | 8 (7.1) | 14 (14.6) | Reference | Reference |  |
| 0-5 | 64 (30.8) | 36 (32.1) | 26 (29.2) | 2.25 | 0.83-6.11 | 0.112 |
| ＞5 | 122 (58.7) | 68(60.7) | 53 (56.3) | 2.20 | 0.86-5.64 | 0.099 |
| coronary heart disease, year |  |  |  |  |  |  |
| 0 | 185 (88.9) | 95 (84.8) | 90 (93.8) | Reference | Reference |  |
| 0-5 | 12 (5.8) | 7 (6.3) | 5 (5.2) | 1.33 | 0.41-4.33 | 0.640 |
| ＞5 | 11 (5.3) | 10 (8.9) | 1 (1.0) | 9.47 | 1.19-75.48 | 0.034 |
| cerebrovascular disease, year |  |  |  |  |  |  |
| 0 | 197(94.7) | 106(94.6) | 91(94.8) | Reference | Reference |  |
| 0-5 | 8(3.8) | 4(3.6) | 4(4.2) | 0.86 | 0.21-3.53 | 0.833 |
| ＞5 | 3(1.5) | 2(1.8) | 1(1.0) | 1.72 | 0.15-19.25 | 0.661 |
| pulmonary heart disease, year |  |  |  |  |  |  |
| 0 | 190 (91.3) | 101 (90.2) | 89 (92.7) | Reference | Reference |  |
| 0-5 | 15 (7.2) | 9 (8.0) | 6 (6.3) | 1.32 | 0.45-3.86 | 0.610 |
| ＞5 | 3 (1.4) | 2(1.8) | 1 (1.0) | 1.76 | 0.16-19.77 | 0.646 |
| osteoporosis, year |  |  |  |  |  |  |
| 0 | 198 (95.2) | 104(92.9) | 94 (97.9) | Reference | Reference |  |
| 0-5 | 3 (1.4) | 2 (1.8) | 1 (1.0) | 1.81 | 0.16-20.26 | 0.631 |
| ＞5 | 7 (3.4) | 6 (5.4) | 1 (1.0) | 5.42 | 0.64-45.88 | 0.121 |
| respiratory failure |  |  |  |  |  |  |
| no | 146 (70.2) | 76 (67.9) | 70 (72.9) | Reference | Reference |  |
| yes | 62 (29.8) | 36 (32.1) | 26 (27.1) | 1.28 | 0.70-2.32 | 0.427 |

COPD: Chronic Obstructive Pulmonary Disease; ADL: Activities of Daily Living Assessment; 95%CI: 95% Confidence Interval.

**Table S3 Results of multiple-factor stepwise regression analysis of different subgroups of patients with ECOPD**

| Variables | Estimate | Std. Error | z value | *P* | OR | 95%CI |
| --- | --- | --- | --- | --- | --- | --- |
| coronary heart disease, year |  |  |  |  |  |  |
| 0 | Reference | | | | | |
| 0-5 | 0.190 | 0.642 | 0.296 | 0.767 | 1.209 | 0.344-4.482 |
| ＞5 | 2.130 | 1.082 | 1.969 | 0.049 | 8.040 | 1.456-159.454 |
| ADL |  |  |  |  |  |  |
| ≥60 | Reference | | | | | |
| ＜60 | 1.507 | 0.331 | 4.549 | <0.001 | 4.500 | 2.390-8.809 |

Adjust covariate: age. ADL: Activities of Daily Living assessment; 95%CI: 95% confidence interval.

**Table S4 Results of Wilcoxon signed-rank test for auxiliary examinations in different subgroups.**

| variable | Class1(n=112), median[interquartile] | Class2(n=96), median[interquartile] | Z | *P*-value |
| --- | --- | --- | --- | --- |
| temperature | 0 [0, 0] | 0 [0, 0] | -1.577 | 0.115 |
| heart rate | 0 [0, 0] | 0 [0, 0] | -0.947 | 0.344 |
| respiratory rate | 2 [2, 4] | 1 [1, 2] | -5.971 | <0.001 |
| blood pressure | 0 [0, 1] | 0 [0, 1] | -0.742 | 0.458 |
| BMI | 1 [0, 1] | 0 [0, 1] | -2.752 | 0.006 |
| edema of lower limbs | 0 [0, 0.75] | 0 [0, 0] | -2.325 | 0.020 |
| pressure Injury | 0 [0, 0] | 0 [0, 0] | -3.606 | <0.001 |
| rale | 2[0, 2] | 0[0, 2] | -3.016 | 0.003 |
| regular heart rate | 0[0, 0] | 0[0, 0] | -1.139 | 0.255 |
| hemoglobin | 0 [0, 1] | 0 [0, 0] | -2.156 | 0.031 |
| white blood cell | 0 [0, 4] | 0 [0, 4] | -0.139 | 0.889 |
| neutrophilic granulocyte percentage | 4 [4, 4] | 4 [4, 4] | -1.073 | 0.283 |
| eosinophils | 0 [0, 4] | 0 [0, 4] | -0.086 | 0.932 |
| blood platelet | 0 [0, 0] | 0 [0, 0] | -1.997 | 0.046 |
| albumin | 1 [0, 1.75] | 0 [0, 1] | -3.261 | 0.001 |
| ALT | 0 [0, 0] | 0[0, 0] | -0.072 | 0.942 |
| AST | 0 [0, 0] | 0 [0, 0] | -0.699 | 0.485 |
| alkaline phosphatase | 0 [0, 0] | 0 [0, 0] | -0.573 | 0.567 |
| γ-GT | 0 [0, 1] | 0 [0, 0] | -0.817 | 0.414 |
| bilirubin | 0 [0, 0] | 0 [0, 0] | -1.611 | 0.107 |
| BUN | 1 [0, 2] | 0 [0, 1] | -1.64 | 0.101 |
| serum creatinine | 0 [0, 0] | 0 [0, 0] | -0.399 | 0.690 |
| blood uric acid | 0 [0, 0] | 0 [0, 0] | -0.715 | 0.475 |
| total cholesterol | 0 [0, 0] | 0 [0, 1] | -0.696 | 0.486 |
| triglyceride | 0 [0, 1] | 0 [0, 0] | -0.362 | 0.718 |
| HDL | 0 [0, 1] | 0 [0, 0] | -3.455 | 0.001 |
| LDL | 1 [0, 1] | 1 [0, 2] | -0.715 | 0.475 |
| Na | 0 [0, 0] | 0 [0, 0] | -1.819 | 0.069 |
| K | 0 [0, 0] | 0 [0, 1] | -1.067 | 0.286 |
| Cl | 0 [0, 4] | 0 [0, 0] | -3.502 | <0.001 |
| Ca | 4 [4, 4] | 4 [0, 4] | -2.129 | 0.033 |
| P | 0 [0, 4] | 0 [0, 4] | -0.287 | 0.774 |
| Mg | 0 [0, 0] | 0 [0, 0] | -0.406 | 0.685 |
| blood glucose | 1 [0, 4] | 1 [0, 4] | -1.016 | 0.310 |
| Ph | 0 [0, 4] | 0 [0, 4] | -0.187 | 0.852 |
| PaO2 | 1 [0, 1] | 0.5 [0, 1] | -0.503 | 0.615 |
| PaCO2 | 4 [0, 4] | 4 [0, 4] | -0.508 | 0.611 |
| SaO2 | 0 [0, 1] | 0 [0, 1] | -0.185 | 0.853 |
| tumor markers | 1 [1, 1] | 1 [0, 1] | -1.780 | 0.075 |
| CRP | 1 [0,2] | 1 [0,2] | -2.107 | 0.035 |
| PCT | 0 [0, 0] | 0 [0, 0] | -2.042 | 0.041 |
| PT | 0 [0, 1] | 0 [0, 1] | -0.017 | 0.986 |
| D-dimer | 4 [0, 4] | 4 [0, 4] | -1.628 | 0.103 |
| pleural effusion | 0 [0,1] | 0 [0, 1] | -1.34 | 0.180 |
| emphysema | 4 [4, 4] | 4 [4, 4] | -0.904 | 0.366 |
| pleural thickening | 0 [0, 4] | 0 [0, 0] | -0.32 | 0.749 |
| bullae of lung | 0 [0, 4] | 0 [0, 4] | -0.299 | 0.765 |
| coronary artery calcium | 4 [0, 4] | 4 [0, 4] | -0.193 | 0.847 |
| pulmonary arterial hypertension | 1 [0, 2] | 1 [0, 2] | -0.325 | 0.745 |

BMI: Body Mass Index; ALT: Alanine Aminotransferase; AST: Aspartate Aminotransferase; γ-GT: Gamma-Glutamyl Transferase; BUN: Blood Urea Nitrogen; HDL: High-Density Lipoprotein; LDL: Low-Density Lipoprotein; CRP: C-Reactive Protein; PCT: Procalcitonin; PT: Prothrombin Time

**Table S5 Results of Wilcoxon rank sum test for outcomes in different subgroups**

| Outcome | | Class 1, n=112 | Class 2, n=96 | Z | *P*-value |
| --- | --- | --- | --- | --- | --- |
| use of a noninvasive ventilator，n(%) | | 46 (41.1%) | 27 (28.1%) | -1.946 | 0.052 |
| sntibiotic, median [interquartile] | types, median [interquartile] | 1 [1, 2] | 1 [1, 1.75] | -2.547 | 0.011 |
| usage days, median [interquartile] | 7 [5, 9] | 6 [4, 7] | -3.501 | <0.001 |
| days of glucocorticoid use, median [interquartile] | | 3[0,7] | 0.5[0.5] | -1.896 | 0.058 |
| inhaler | types, median [interquartile] | 3 [2,3] | 3 [2, 3] | -1.000 | 0.317 |
| usage days, median [interquartile] | 6 [4, 9] | 5 [3, 7] | -2.763 | 0.006 |
| length of stay, median [interquartile] | | 7.5 [6, 10] | 6 [5, 8] | -3.463 | 0.001 |
| admitted in care unit (ICU)，n（%） | | 29 (25.8%) | 14(14.5%) | -2.003 | 0.045 |
| readmitted within 3 months，n（%） | | 29 (25.8%) | 24 (25.0%) | -0.147 | 0.883 |
| days of special care, median [interquartile] | | 4.8 [0, 7.8] | 1.75 [0, 6] | -3.059 | 0.002 |
| total cost of hospitalization, median [interquartile] | | 14060.4 [10176.6, 222128.1] | 11154.3 [7695.9, 14677.1] | -3.757 | <0.001 |

**Figure S1 Scree plot of symptom clusters in patients with ECOPD**


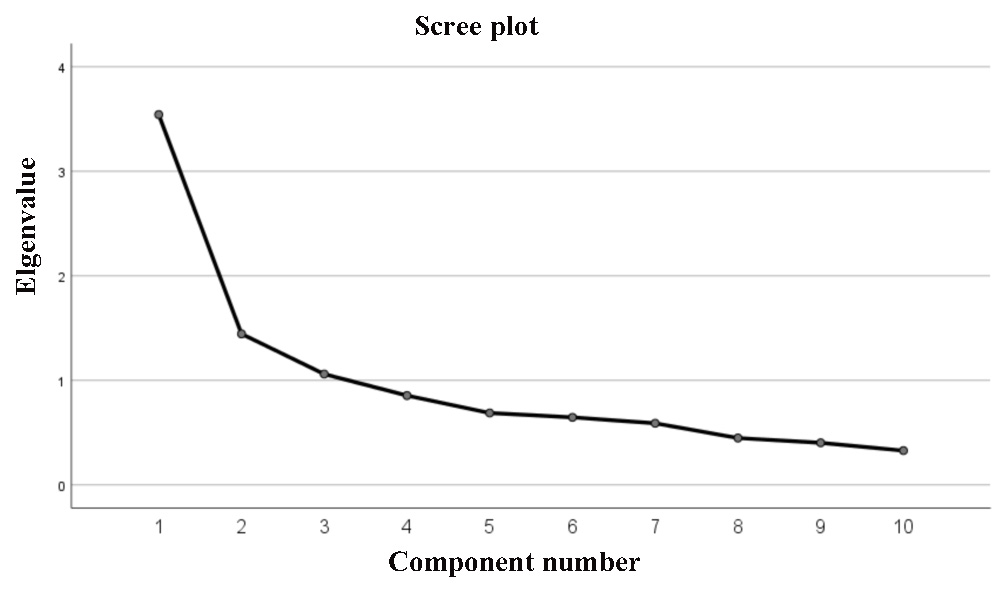


**Figure S2 Accuracy estimation of edge weights in the symptom network of patients with ECOPD (A); Stability test of centrality indicators (B)**


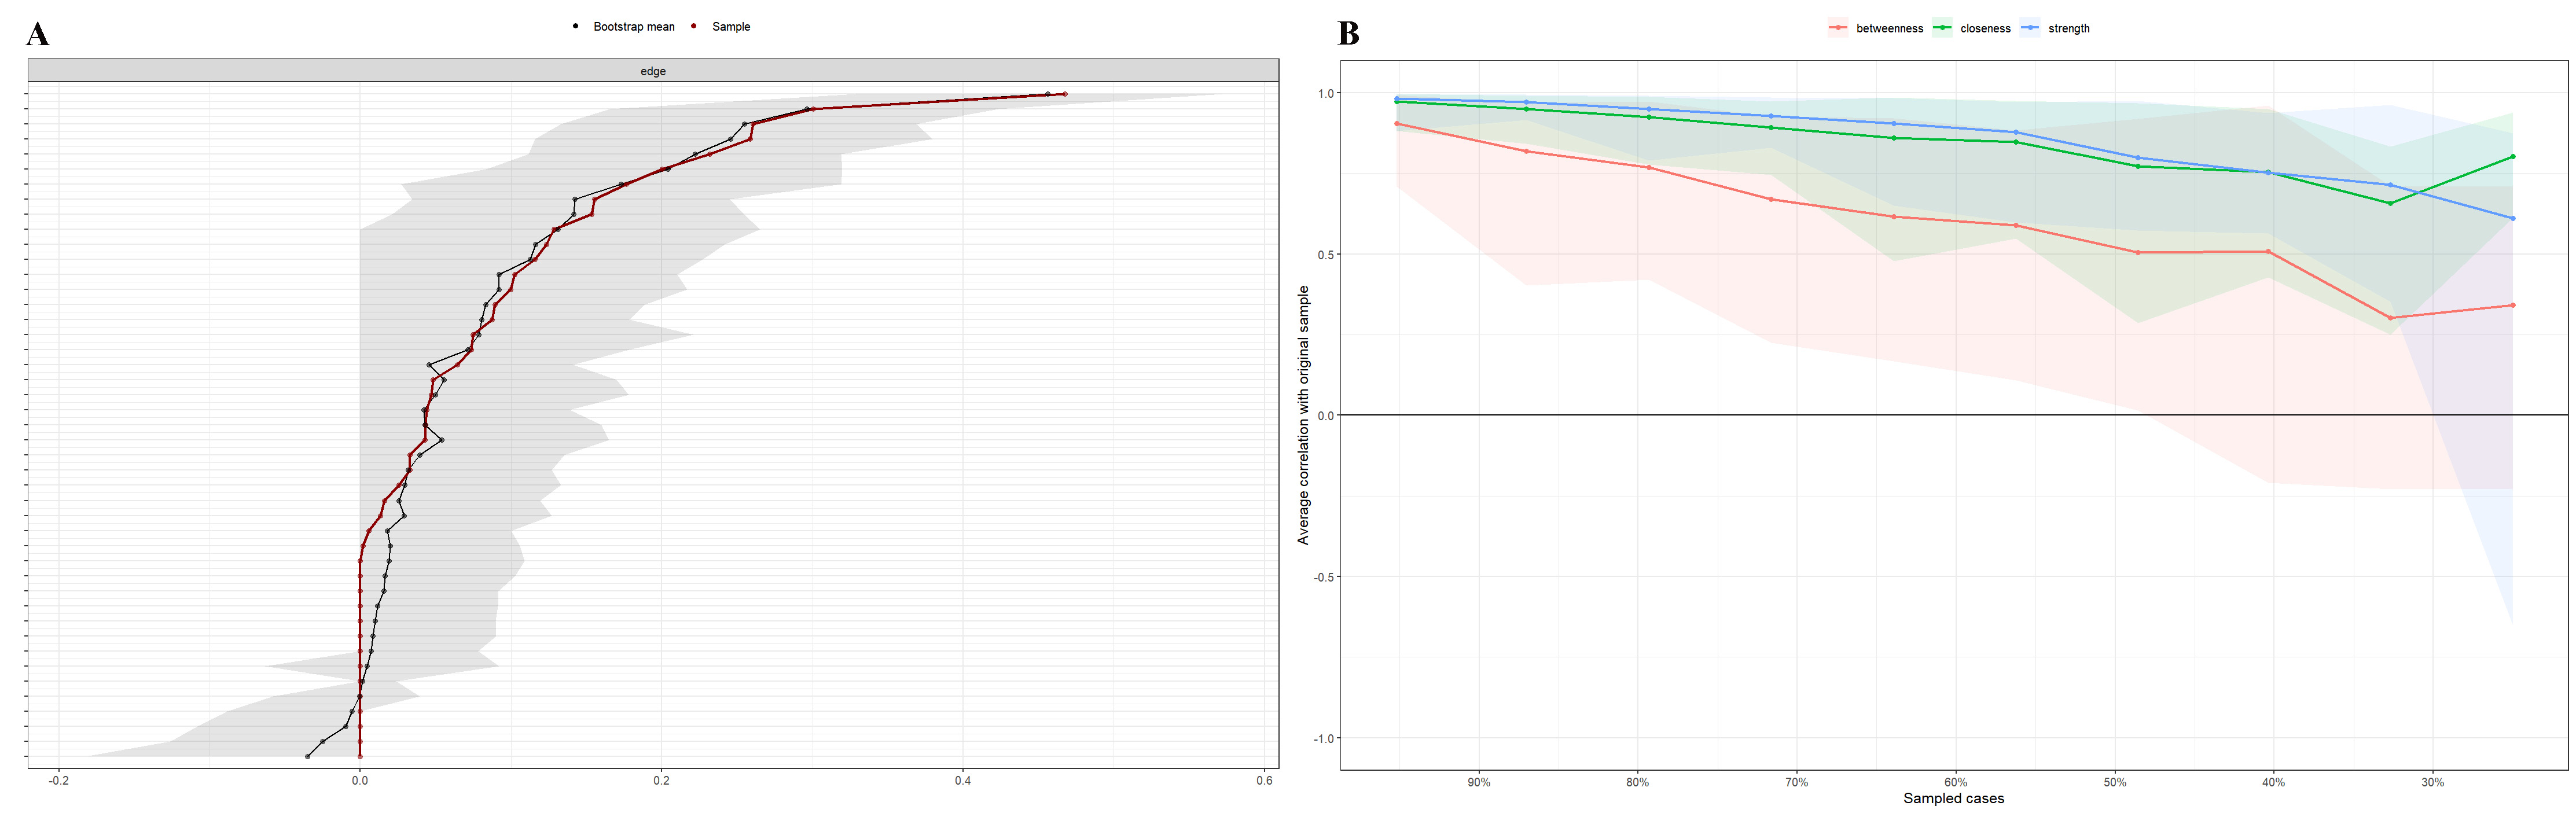


**Figure S3 Stability test of centrality indicators of bridge symptoms in the symptom network of patients with ECOPD**


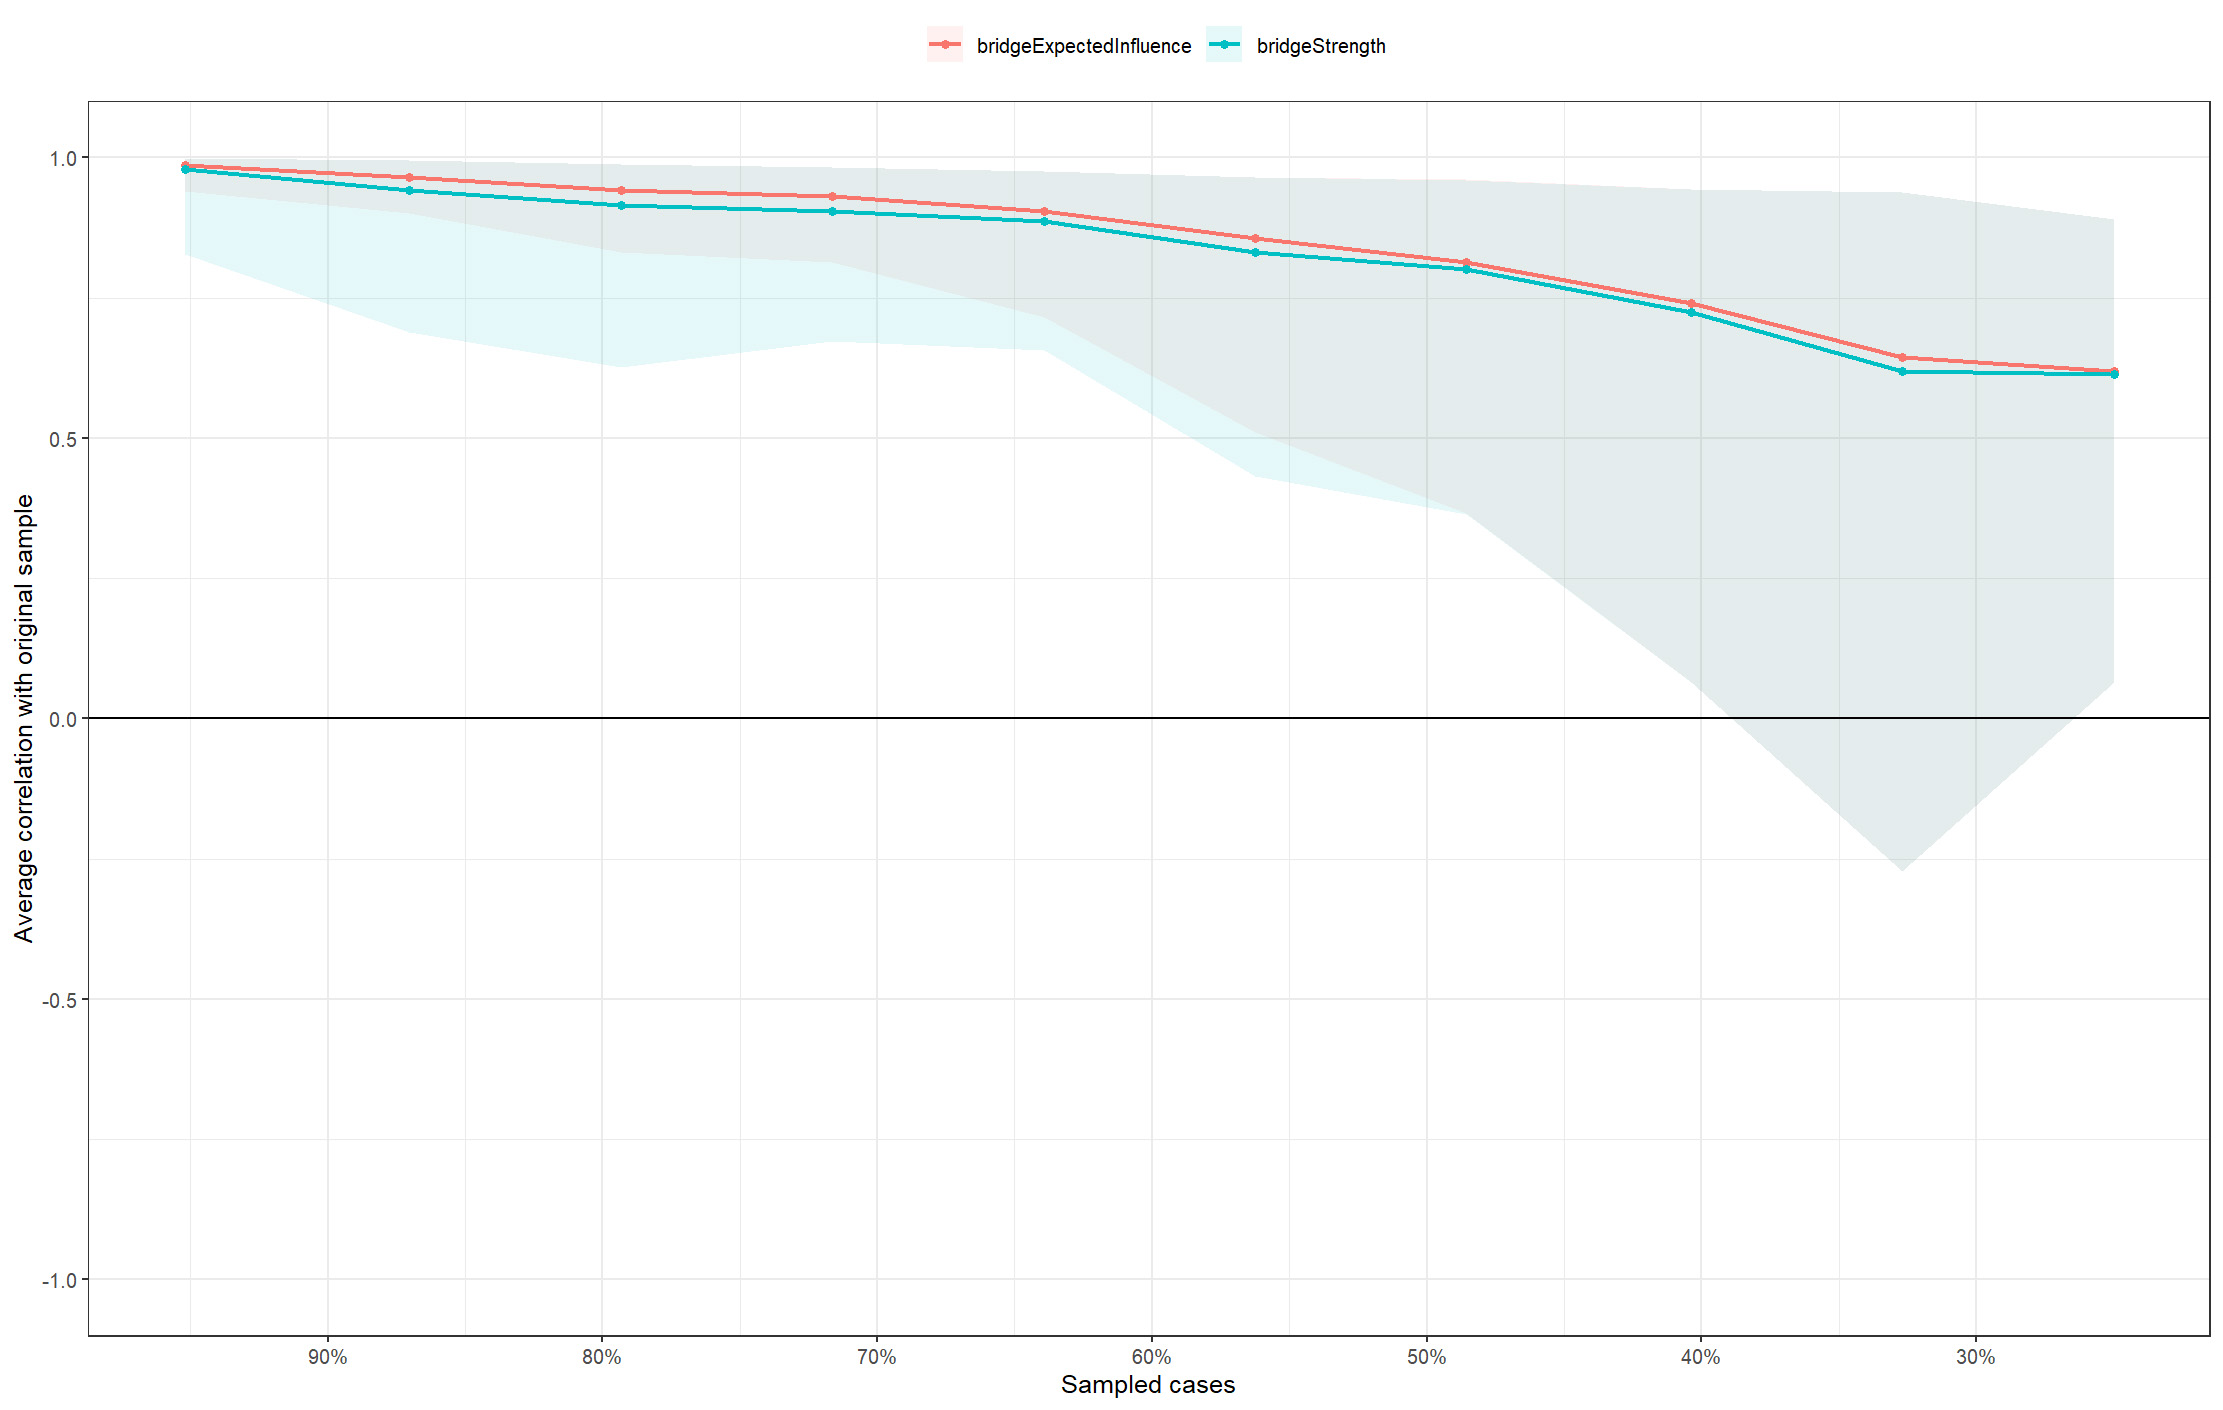


**Figure S4 Correlation Heatmap between Severity of Symptoms in Different Subgroups and Auxiliary Examinations. (A-Class1) High-symptom group; (B-Class2) Low-symptom group.**


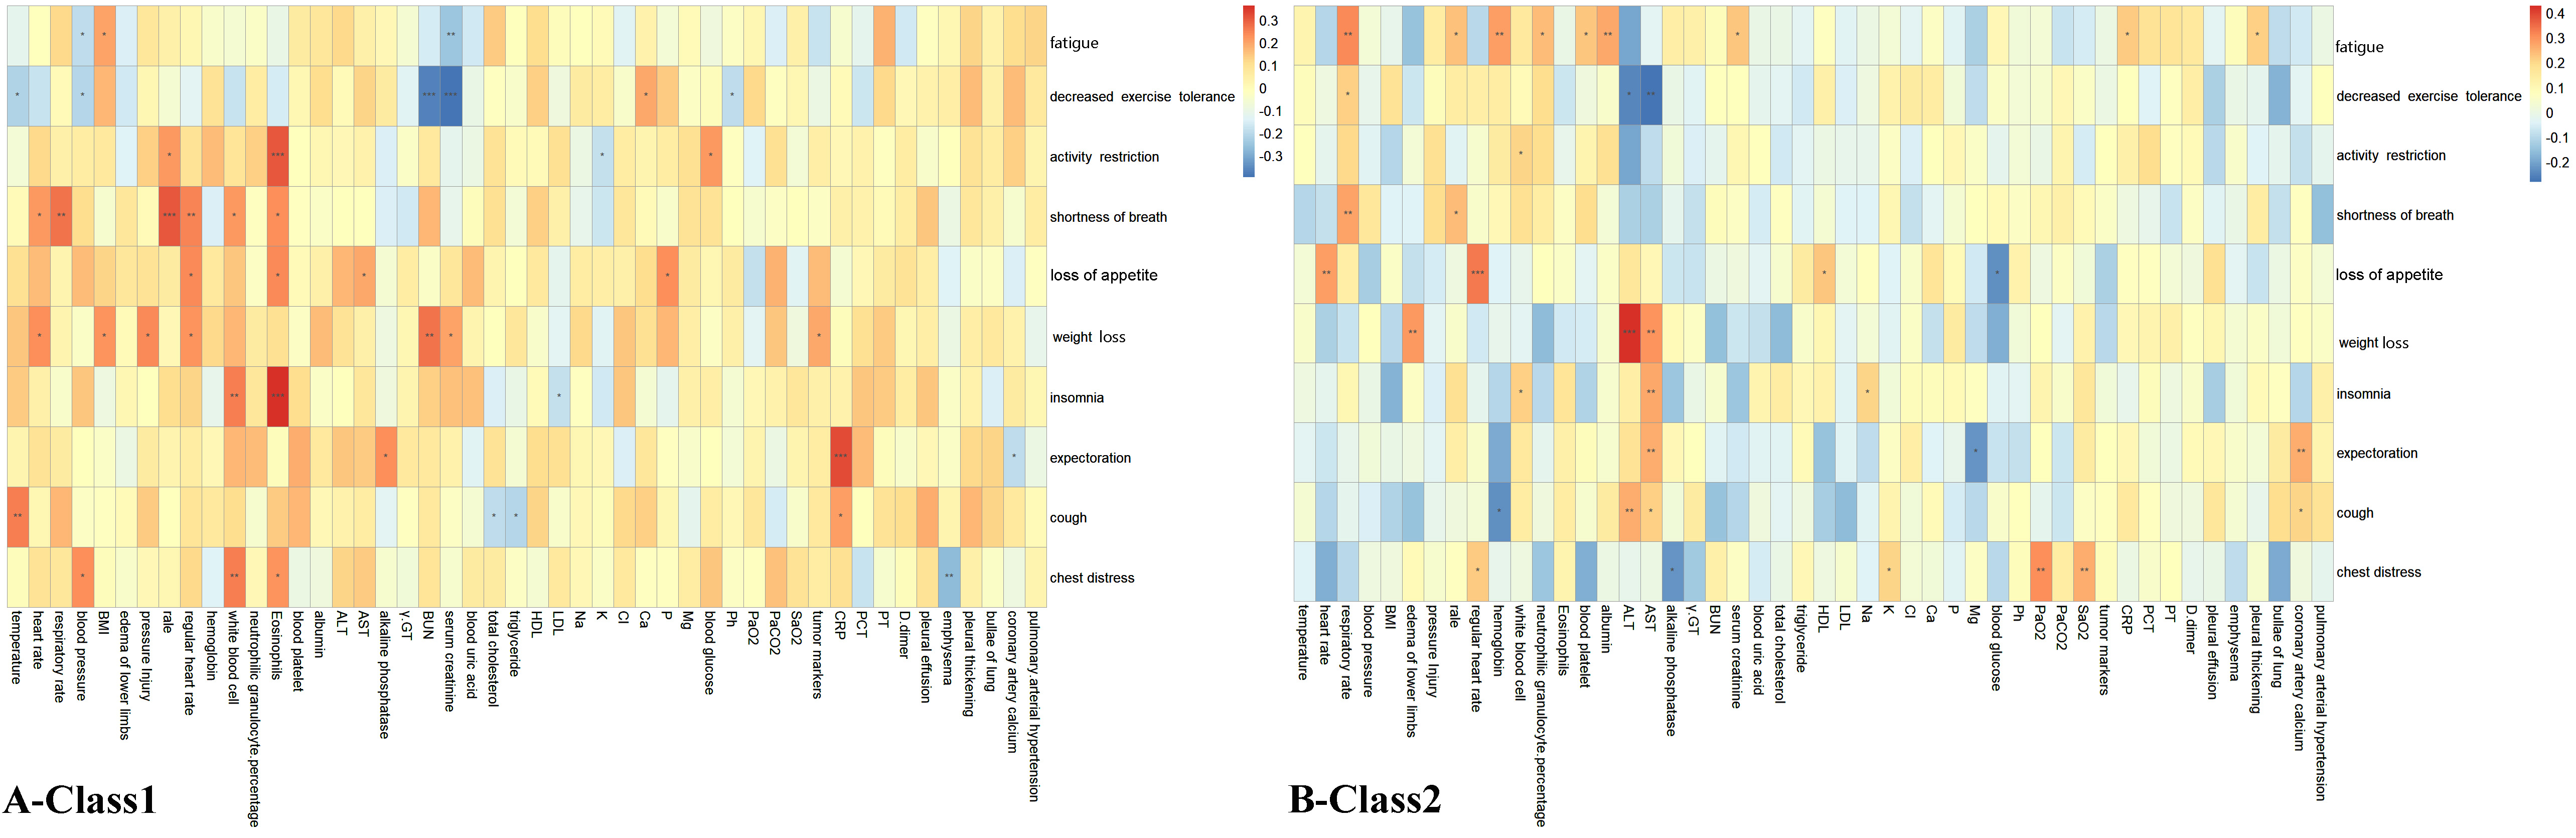


BMI: Body Mass Index; ALT: Alanine Aminotransferase; AST: Aspartate Aminotransferase; γ-GT: Gamma-Glutamyl Transferase; BUN: Blood Urea Nitrogen; HDL: High-Density Lipoprotein; LDL: Low-Density Lipoprotein; CRP: C-Reactive Protein; PCT: Procalcitonin; PT: Prothrombin Time; **p* < 0.05, ***p* < 0.01，****p* < 0.001.
